# Supplementary material for: Synthesis and Conformational Analysis of Fluorinated Uridine Analogues Provide Insight into a Neighbouring-Group Participation Mechanism
Source: PubMed Central journal article supplement (PMC7728060; doi:10.3390/molecules25235513), 2020-11-25
Supplement: molecules-25-05513-s001.pdf [file molecules-25-05513-s001.pdf]

# Supporting Information

## Synthesis and conformational analysis of fluorinated uridine analogues provide insight into a neighbouring group participation mechanism

Freideriki Michailidou<sup>1,2</sup>, Tomas Lebl<sup>1</sup>, Alexandra M. Z. Slawin<sup>1</sup>, Sunil Vishnuprasadji Sharma,<sup>1</sup> Murray J. B. Brown<sup>2</sup>, and Rebecca Jane Miriam Goss<sup>1\*</sup>

<sup>1</sup> School of Chemistry, University of St Andrews, North Haugh, St Andrews, Fife, KY16 9ST, UK; rjmg@st-andrews.ac.uk

<sup>2</sup> GSK, Stevenage, SG1 2NY, UK

\* Correspondence: rjmg@st-andrews.ac.uk; Tel.: (optional; include country code; if there are multiple corresponding authors, add author initials) +xx-xxxx-xxx-xxxx (F.L.)

Received: date; Accepted: date; Published: date

### Table of contents

|                                                                                         |   |
|-----------------------------------------------------------------------------------------|---|
| Scheme S1.....                                                                          | 3 |
| Analysis of <sup>19</sup> F and <sup>1</sup> H NMR spectra of compounds 12 and 13 ..... | 3 |
| Figure S1.....                                                                          | 3 |
| Figure S2. ....                                                                         | 4 |
| Figure S3. ....                                                                         | 5 |
| Figure S4.....                                                                          | 5 |
| Figure S5.....                                                                          | 6 |
| Conformational analysis of compounds 12-13 and related literature data .....            | 7 |
| Figure S6.....                                                                          | 7 |
| Table S1. ....                                                                          | 8 |
| Figure S7.....                                                                          | 9 |

|                 |    |
|-----------------|----|
| Figure S8.....  | 9  |
| Figure S9.....  | 10 |
| Figure S10..... | 10 |
| Figure S12..... | 11 |
| Figure S13..... | 12 |
| Figure S14..... | 12 |
| Figure S15..... | 13 |
| Figure S16..... | 13 |
| Figure S17..... | 14 |
| Figure S18..... | 14 |

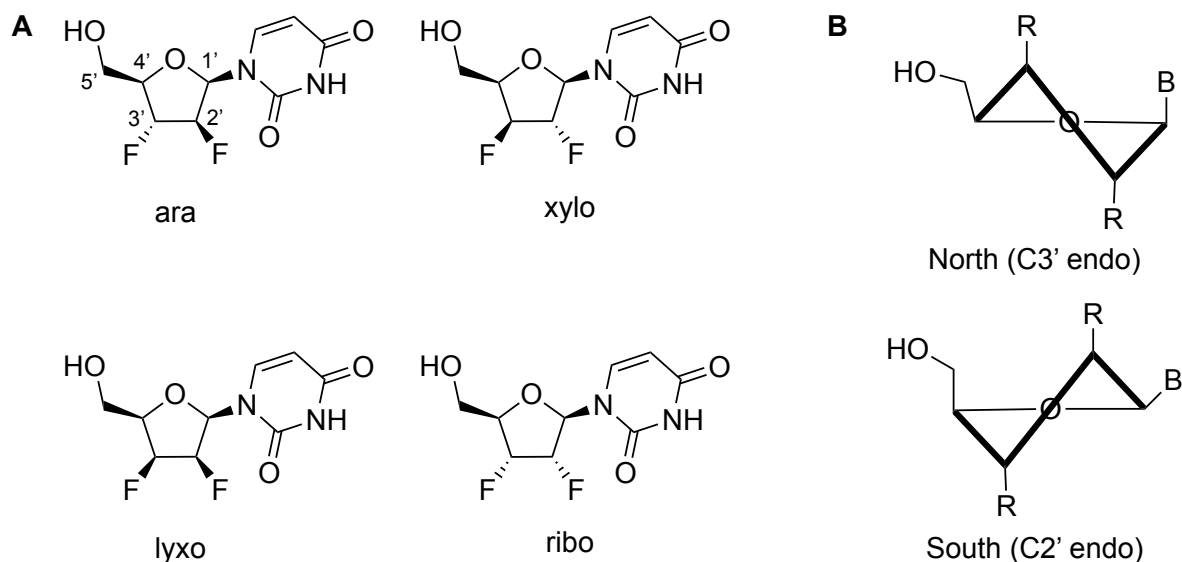

**Scheme S1.** **A** The four different stereochemistries found in the sugar moiety of the nucleosides: 'ribo', 'ara', 'xylo' and 'lyxo'. The sugar moiety is numbered to indicate the relevant positions. **B** The 'North' and 'South' conformation of nucleosides.

#### Analysis of $^{19}\text{F}$ and $^1\text{H}$ NMR spectra of compounds 12 and 13

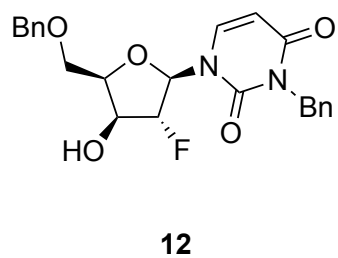

The desired monofluorinated product **12**, obtained in a 53% yield after flash column chromatography, was analysed by NMR. The  $^{19}\text{F}\{^1\text{H}\}$ NMR revealed a singlet at  $-185$  ppm. The proton coupled spectrum revealed a ddd, with the expected coupling constants:  $^2J_{\text{F-H}2'}$  48.8 Hz,  $^3J_{\text{F-H}1'}$  20.9 Hz,  $^3J_{\text{F-H}3'}$  9.9 Hz (**Figure S1**).

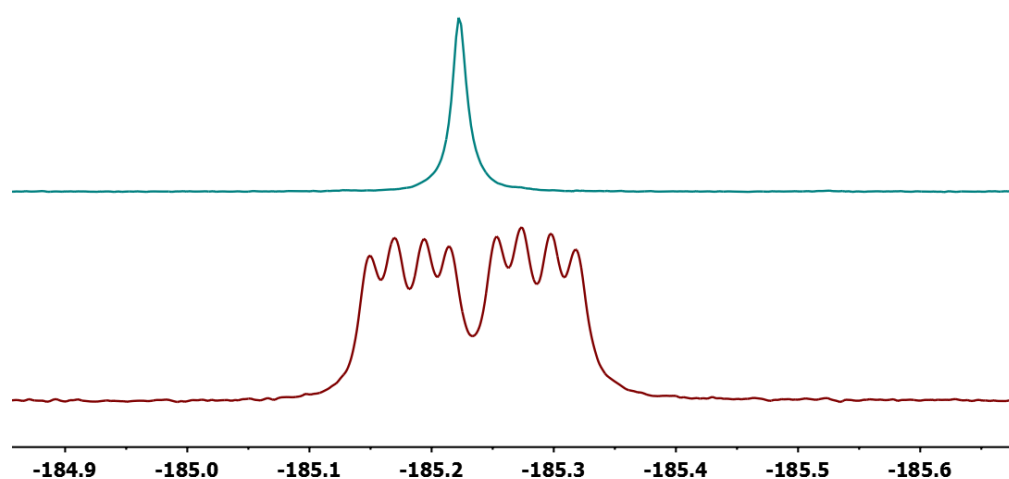

**Figure S1.** Partial  $^{19}\text{F}\{^1\text{H}\}$ NMR (top) and  $^{19}\text{F}$  NMR (bottom) of compound **12** (282 MHz,  $\text{CDCl}_3$ ).

The position of the fluorine at the C2' was verified by  $^1\text{H}$  NMR and  $^1\text{H}\{\text{F}\}$ NMR. The apparent singlet at 5.92 ppm in the fluorine decoupled  $^1\text{H}$  NMR corresponds to the H1', and splits into a doublet with a coupling constant of 20.9 Hz in the fluorine coupled spectrum. This coupling constant is representative of  $^3J$  proton-fluorine interaction (Figure S2).

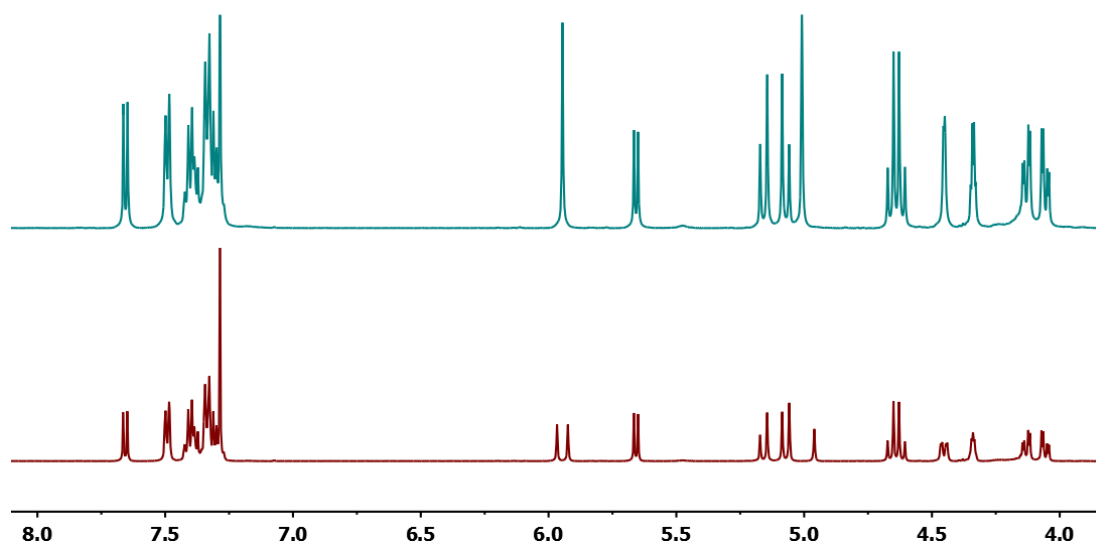

**Figure S2.**  $^1\text{H}\{\text{F}\}$ NMR (top) and  $^1\text{H}$  NMR (bottom) of compound **12** (500 MHz,  $\text{CDCl}_3$ ).

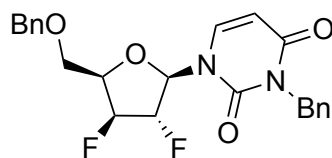

The  $^{19}\text{F}\{\text{H}\}$ NMR (**Figure S3**) of the compound assigned as the difluorinated molecule **13**, revealed the expected doublets at  $-192$  and  $-208$  ppm ( $J = 14.3$  Hz).

**13**

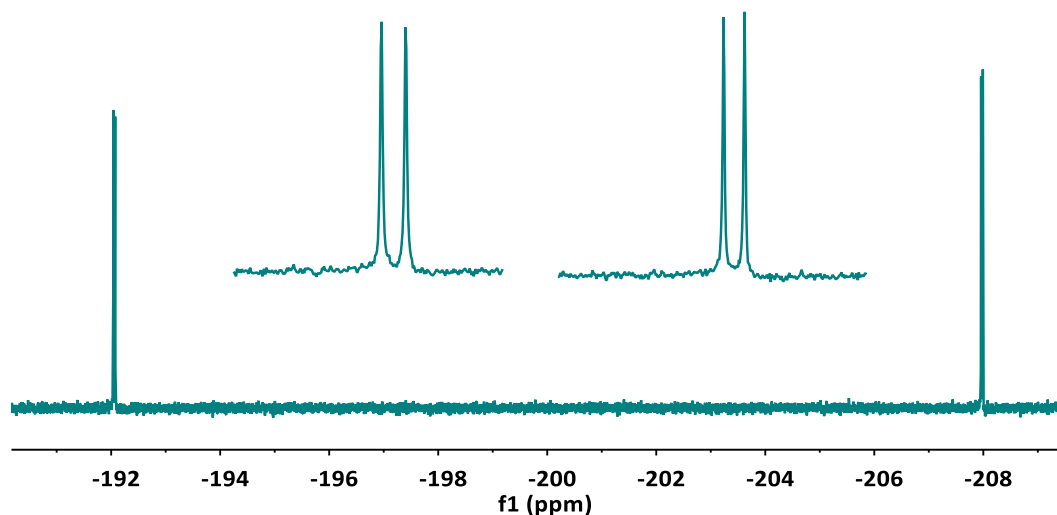

**Figure S3.** Partial  $^{19}\text{F}\{\text{H}\}$ NMR of compound **13** (282 MHz,  $\text{CDCl}_3$ ).

The  $^1\text{H}$  NMR and  $^1\text{H}\{\text{F}\}$ NMR of compound **13** were recorded. The H4' appears as a td of 1 proton at 4.50 ppm in the  $^1\text{H}\{\text{F}\}$ NMR, but splits into two multiplets of 0.5 protons each in the  $^1\text{H}$  NMR (**Figure S4**).

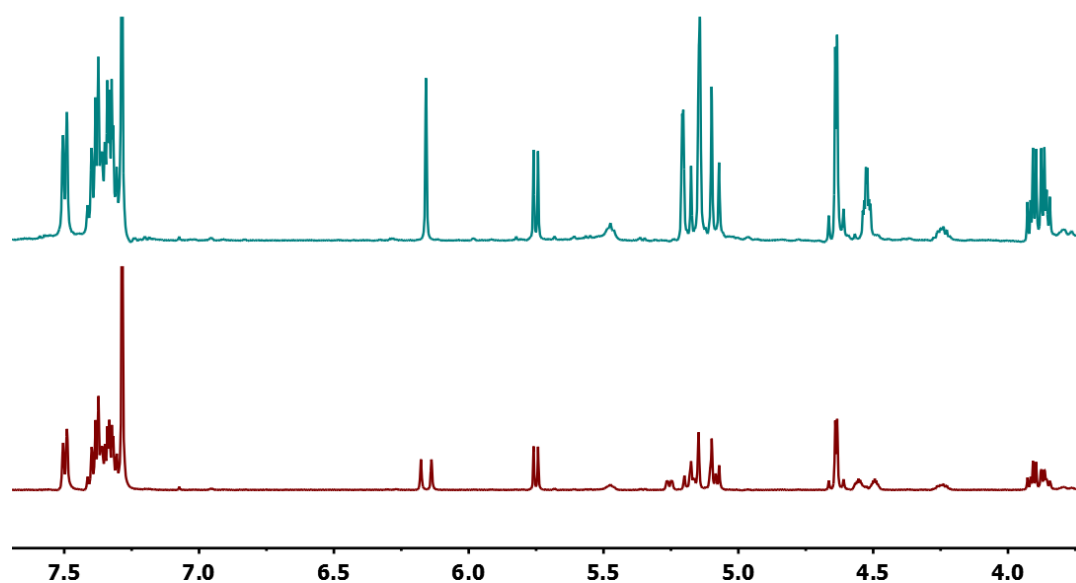

**Figure S4.**  $^1\text{H}$  NMR (top) and  $^1\text{H}\{\text{F}\}$ NMR (bottom) of compound **13** (500 MHz,  $\text{CDCl}_3$ ).

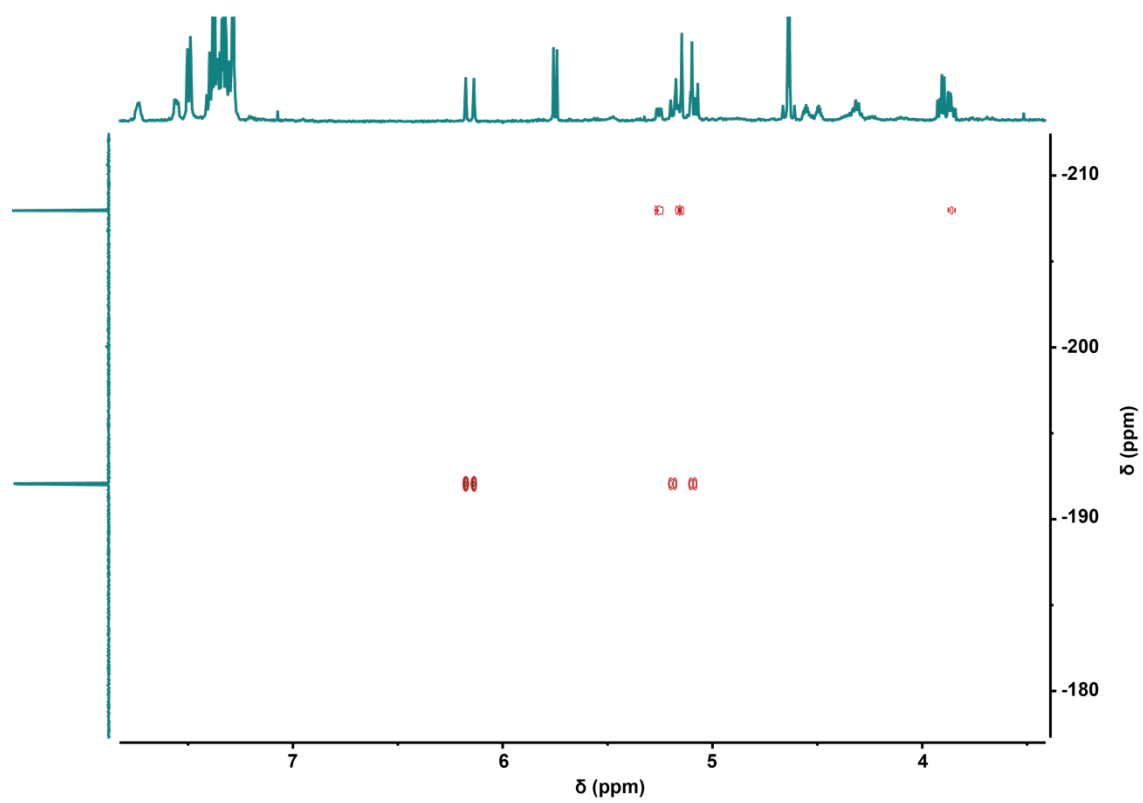

Figure S5.  $^1\text{H},^{19}\text{F}$  HMBC of compound 13 ( $\text{CDCl}_3$ ).

## Conformational analysis of compounds 12-13 and related literature data

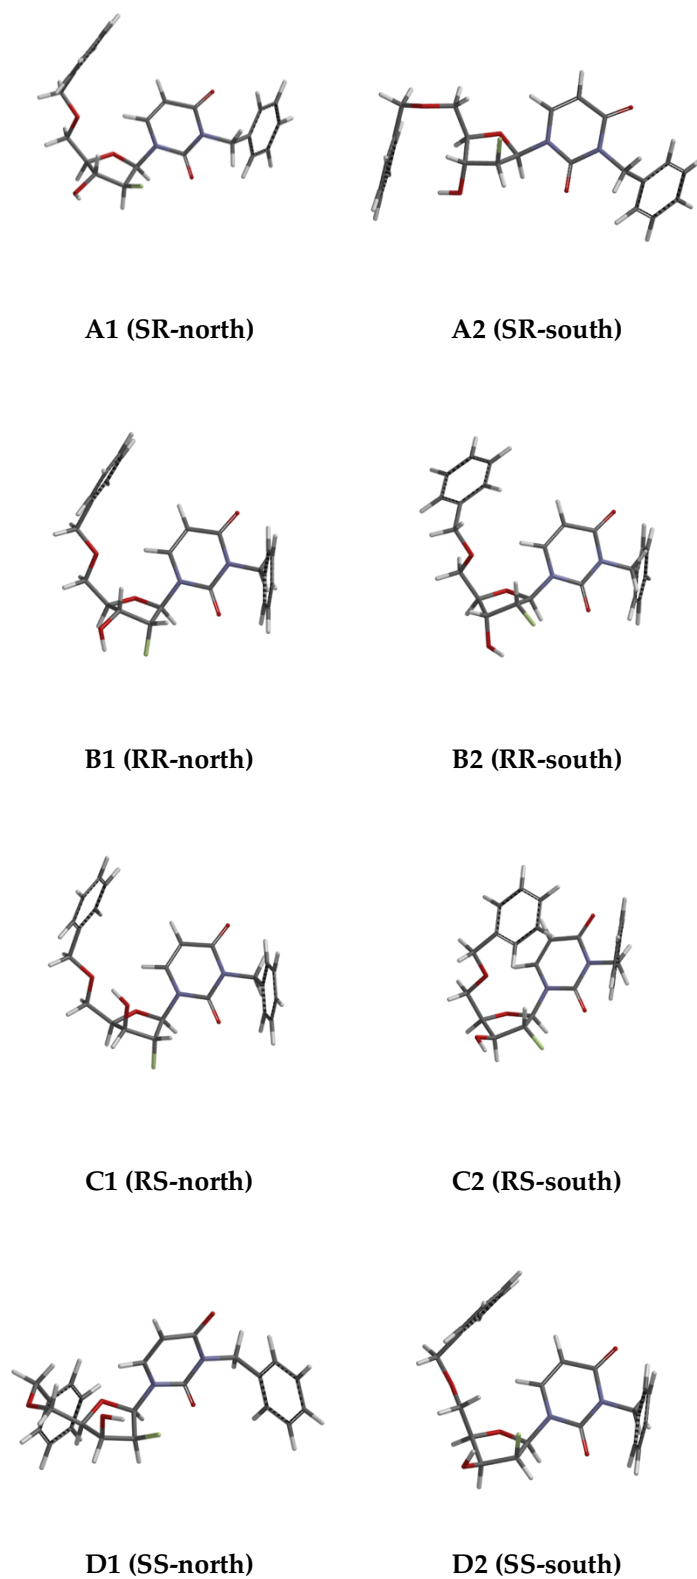

**Figure S6.** Modelling of the conformers of compound **12** (B3LYP/6-31G\* level of theory).

Barchi *et al.*<sup>23</sup> reported the synthesis and conformational analysis of the 2',3'-difluoro-dideoxy uridine analogues with the ara- and xylo- stereochemistry (Table S1). The coupling constants values are in agreement with McAtee *et al.*<sup>22</sup>

**Table S1.** Experimental spin-spin coupling constant values for compounds S1 and S2, adapted from Barchi *et al.*<sup>23</sup> Coupling constants are shown in Hz.

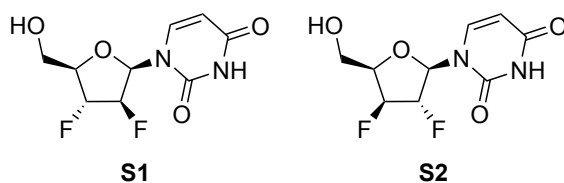

| Compound | T(K) | $J_{H1'-H2'}$ | $J_{H2'-H3'}$ | $J_{H3'-H4'}$ |
|----------|------|---------------|---------------|---------------|
| S1       | 283  | 3.57          | 1.63          | 3.33          |
|          | 343  | 3.76          | 1.72          | 3.48          |
| S2       | 283  | 1.07          | 1.05          | 2.58          |
|          | 343  | 1.65          | 1.18          | 2.69          |



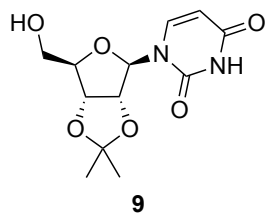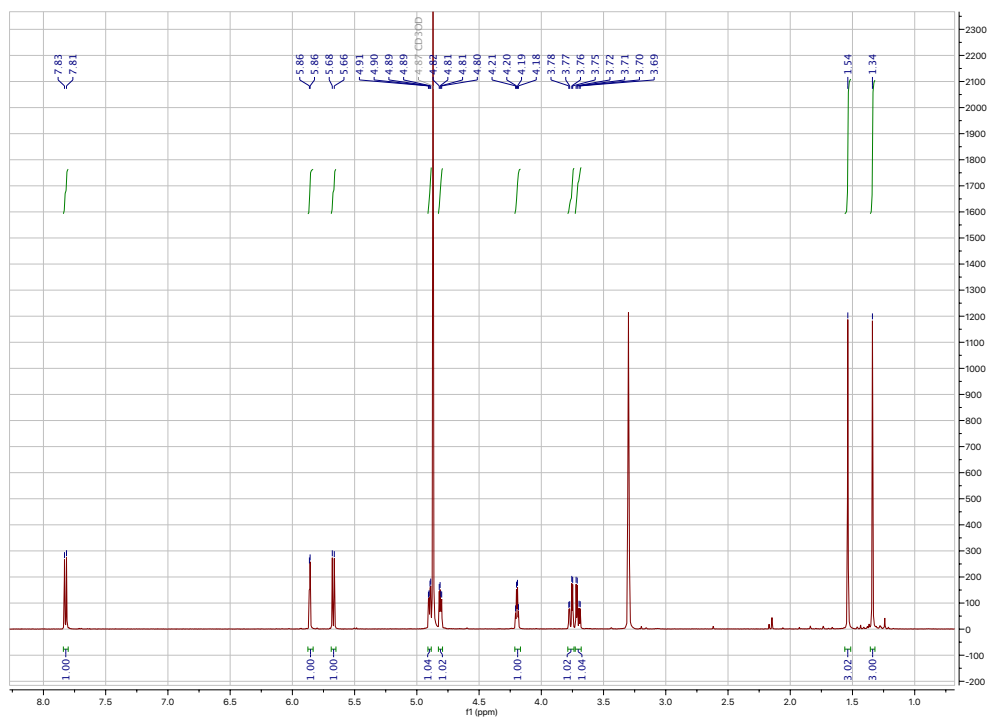

Figure S7.  $^1\text{H}$  NMR ( $\text{CD}_3\text{OD}$ , 500 MHz) of 2',3'-*O*-isopropylidene uridine (9).

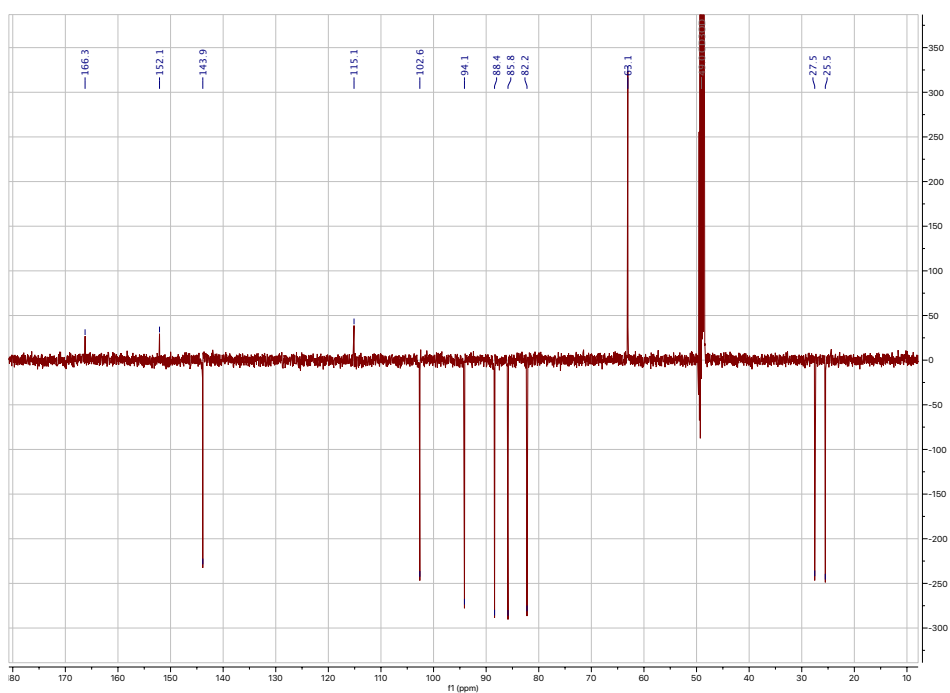

Figure S8.  $^{13}\text{C}$  NMR DEPTQ ( $\text{CD}_3\text{OD}$ , 126 MHz) spectrum of 2',3'-*O*-isopropylidene uridine (9).

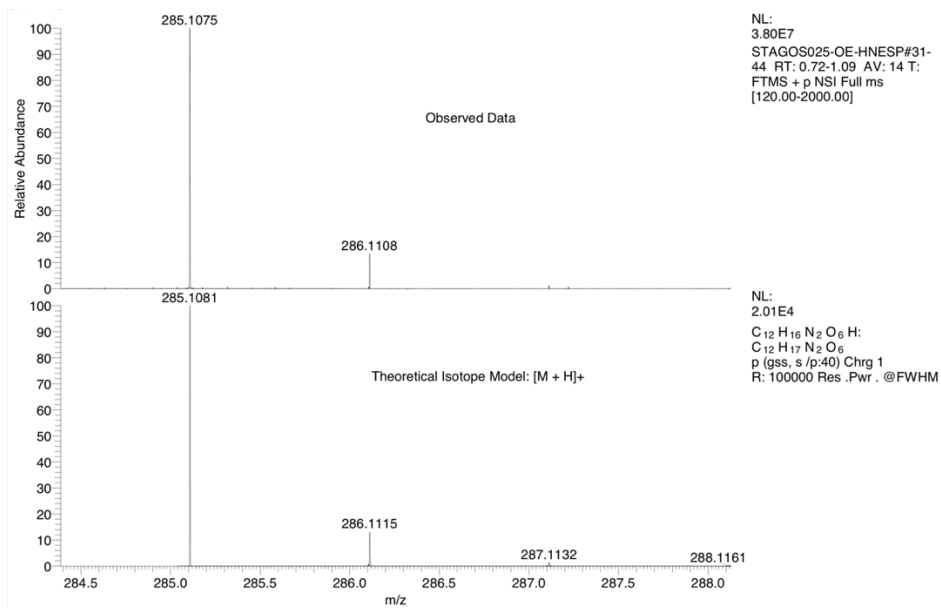

**Figure S9.** HRMS of 2',3'-*O*-isopropylidene uridine (9). HRMS (ES<sup>+</sup>) *m/z* calc. for C<sub>12</sub>H<sub>17</sub>N<sub>2</sub>O<sub>6</sub> [M + H]<sup>+</sup> 285.1081, found 285.1075.

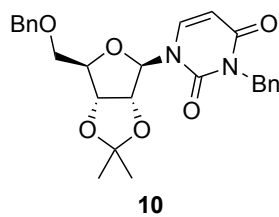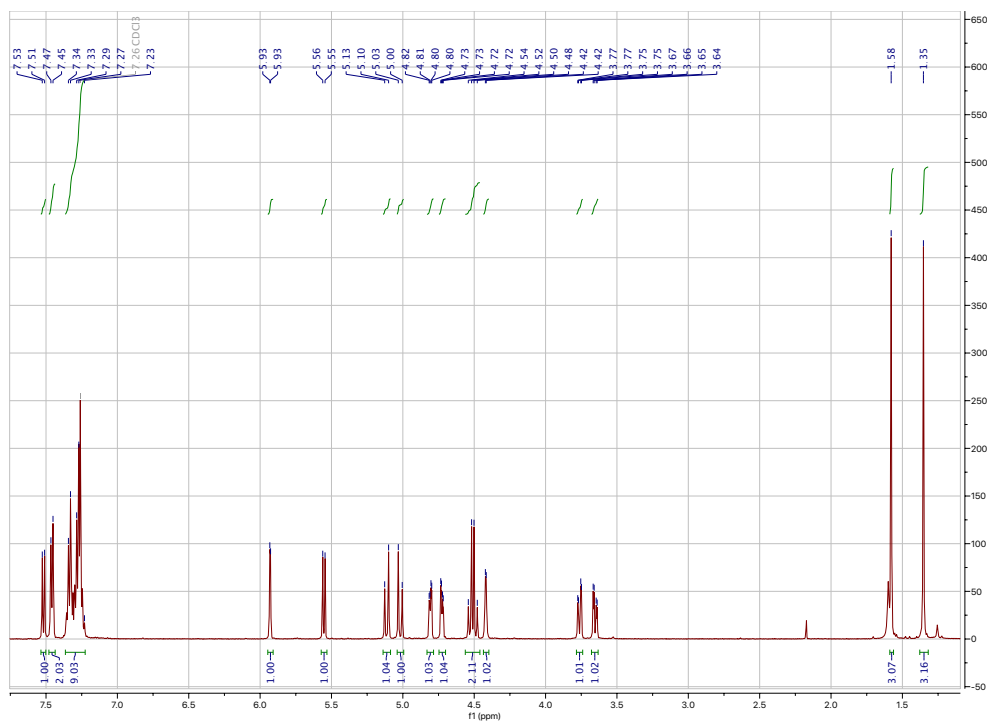

**Figure S10.** <sup>1</sup>H NMR (CDCl<sub>3</sub>, 500 MHz) of 3,5'-dibenzyl-2',3'-*O*-isopropylidene uridine (10).

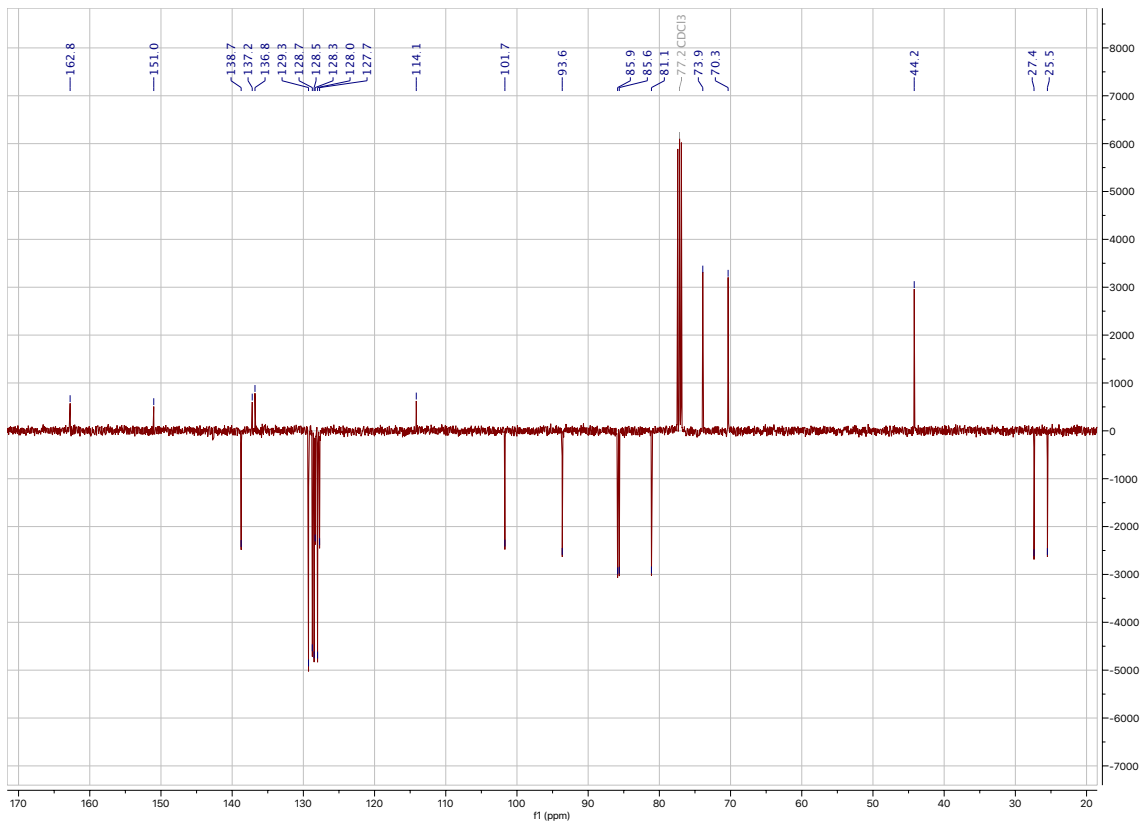

Figure S11.  $^{13}\text{C}$  NMR DEPTQ NMR of 3,5'-dibenzyl-2',3'-O-isopropylidene uridine (10).

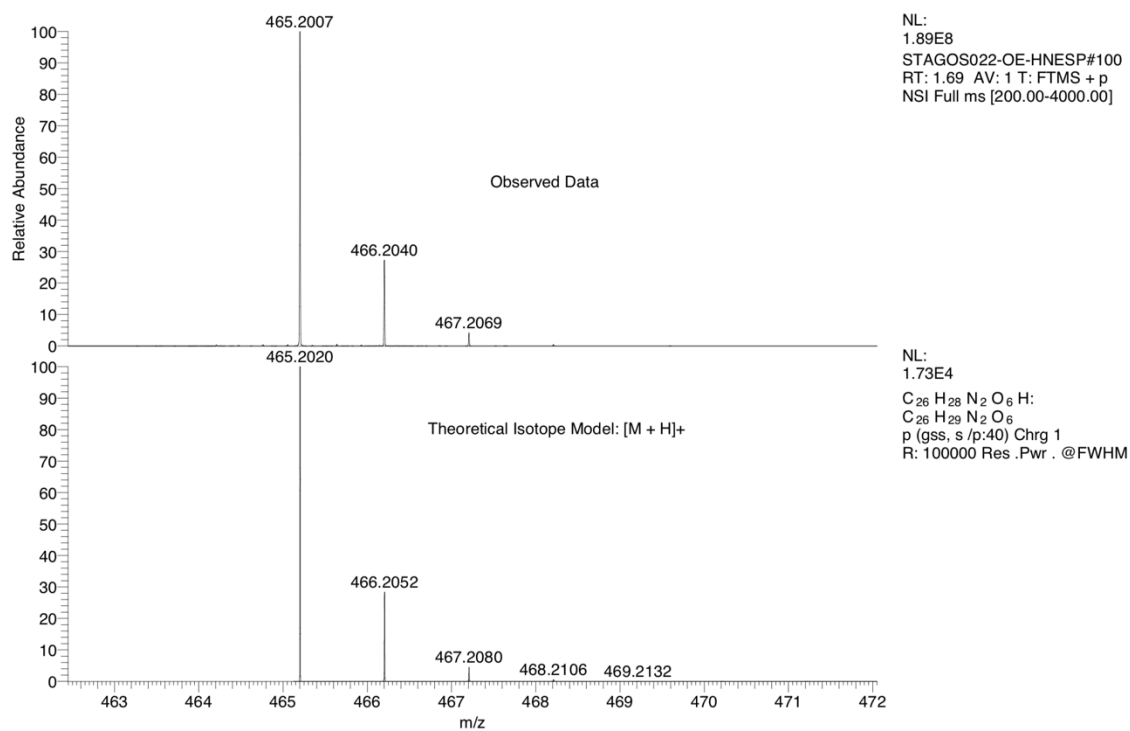

Figure S12. HRMS of 3,5'-dibenzyl-2',3'-O-isopropylidene uridine (10).

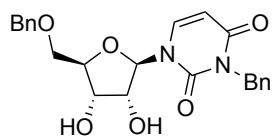

11

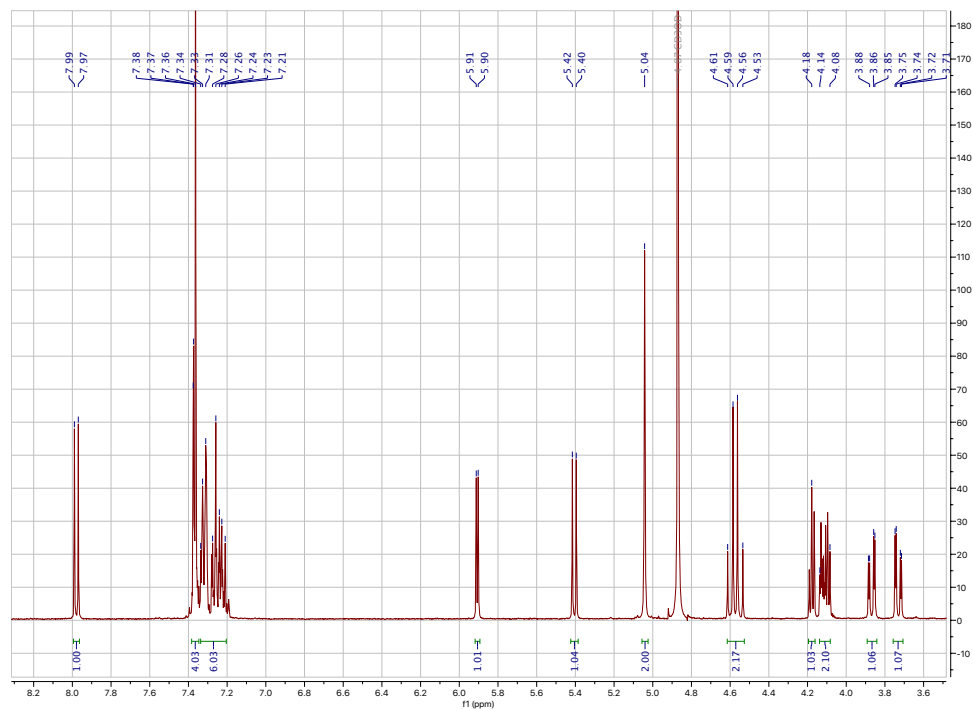

Figure S13.  $^1\text{H-NMR}$  ( $\text{CD}_3\text{OD}$ , 400 MHz) of 3',5'-dibenzyl-uridine (11).

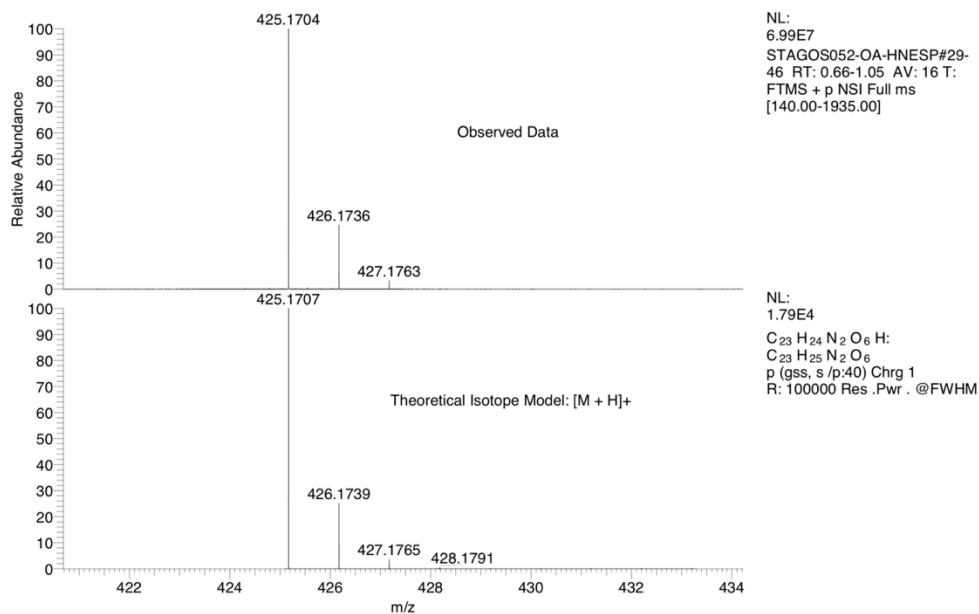

Figure S14. HRMS of 3',5'-dibenzyl-uridine (11). HRMS ( $\text{ES}^+$ ) calc. for  $\text{C}_{23}\text{H}_{25}\text{N}_2\text{O}_6$   $[\text{M} + \text{H}]^+$   $m/z$  425.1707, found 425.1704.

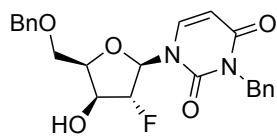

12

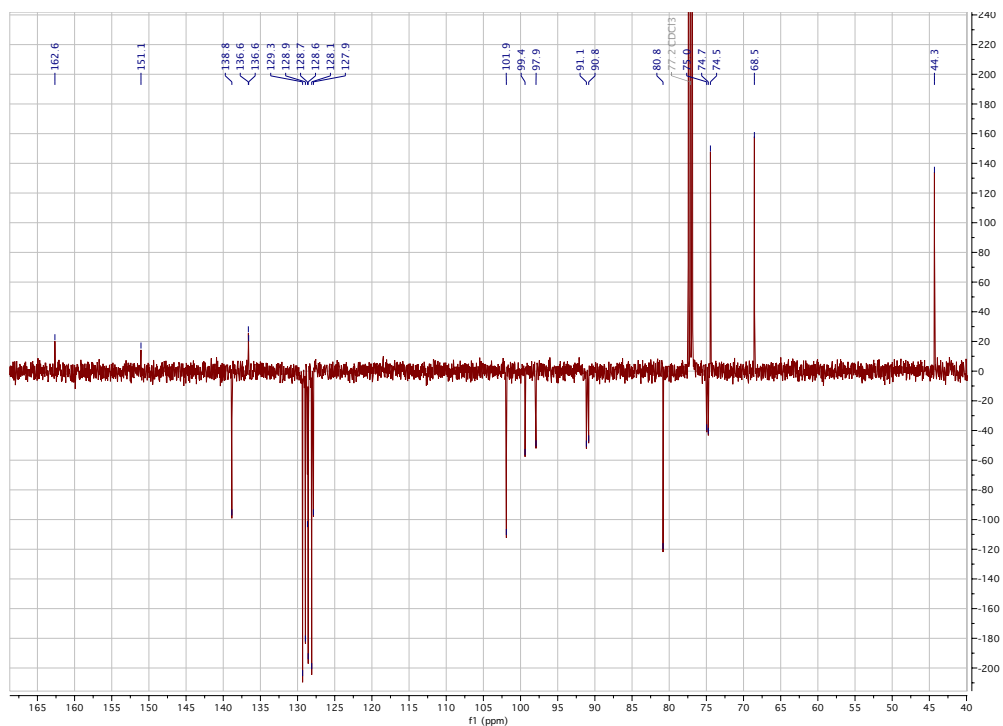

**Figure S15.**  $^{13}\text{C}$  NMR ( $\text{CDCl}_3$ , 126 MHz) of 1-(5-*O*-benzyl-3-*O*-2'-deoxy-2'-fluoro- $\beta$ -D-arabinofuranosyl)-*N*<sup>3</sup>-benzyluracil (12).

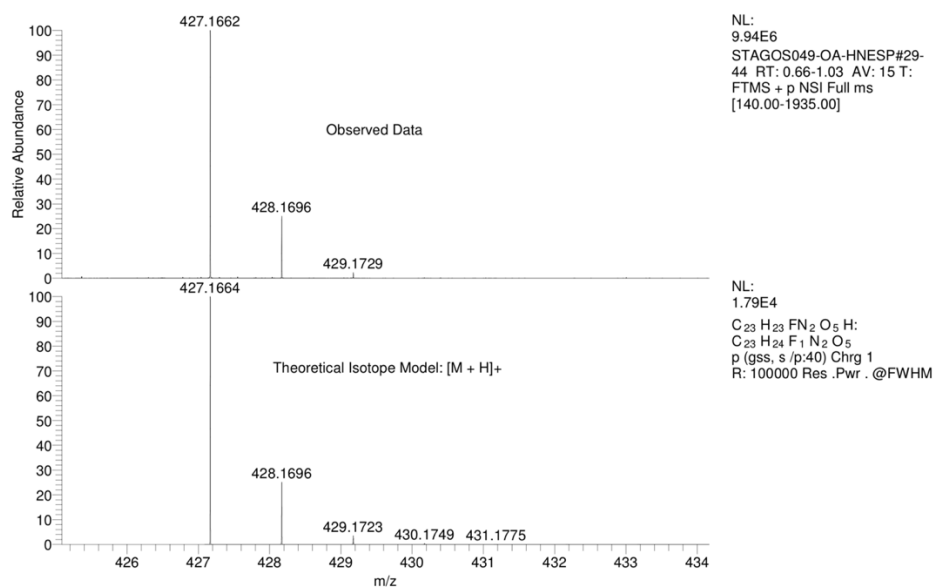

**Figure S16.** HRMS of 1-(5-*O*-benzyl-3-*O*-2'-deoxy-2'-fluoro- $\beta$ -D-arabinofuranosyl)-*N*<sup>3</sup>-benzyluracil (12). HRMS ( $\text{ES}^+$ ) calc. for  $\text{C}_{23}\text{H}_{24}\text{F}_1\text{N}_2\text{O}_5$   $[\text{M} + \text{H}]^+$   $m/z$  427.1664, found 427.1662.

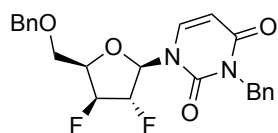

13

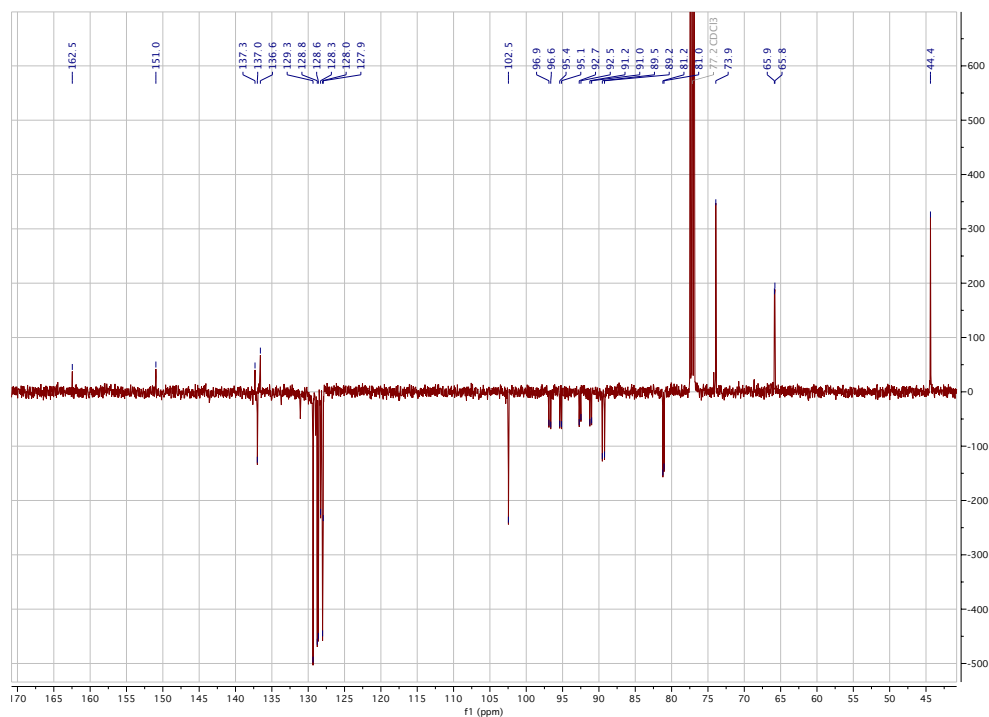

**Figure S17.**  $^{13}\text{C}$  NMR ( $\text{CDCl}_3$ , 126 MHz) of 1-(5-O-benzyl-3-O-2',3'-dideoxy-2',3'-difluoro- $\beta$ -D-xylofuranosyl)- $\text{N}^3$ -benzyluracil (13).

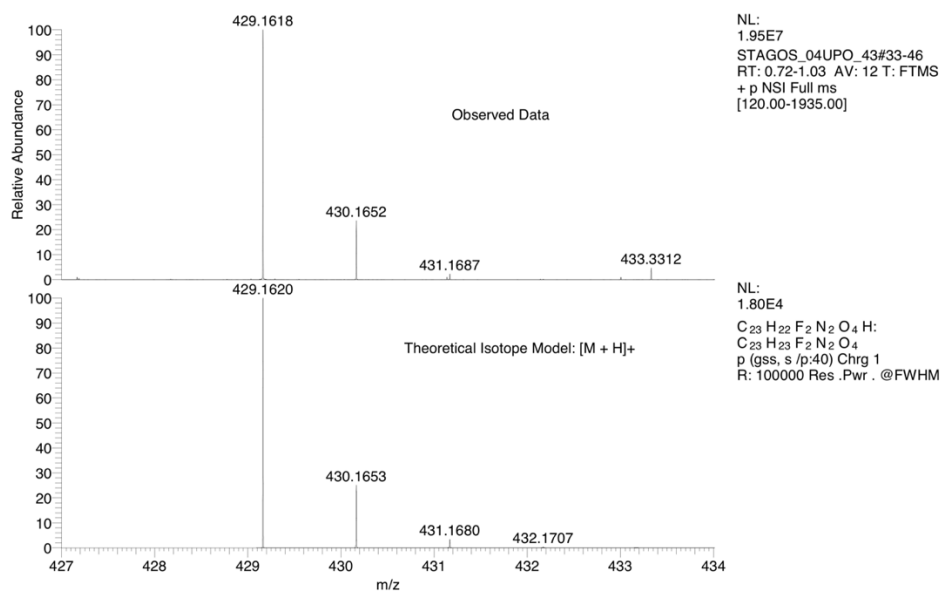

**Figure S18.** HRMS of 1-(5-O-benzyl-3-O-2',3'-dideoxy-2',3'-difluoro- $\beta$ -D-xylofuranosyl)- $\text{N}^3$ -benzyluracil (13). HRMS ( $\text{ES}^+$ ) calc. for  $\text{C}_{23}\text{H}_{23}\text{F}_2\text{N}_2\text{O}_4$   $[\text{M} + \text{H}]^+$   $m/z$  429.1620, found 429.1618.
